# Supplementary material
Source: Springer Nature journal article supplement (https://www.springermedizin.de/resource/supplementary/12906_2009_293_MOESM1_ESM.pdf/9519360)

# Smokers

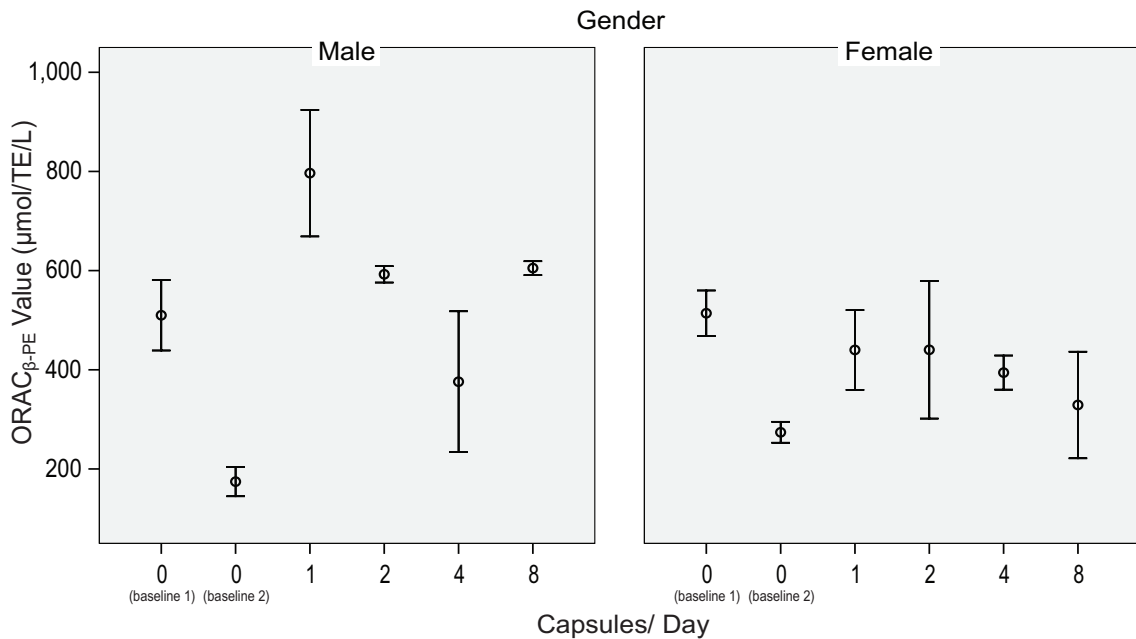

# Non-Smokers

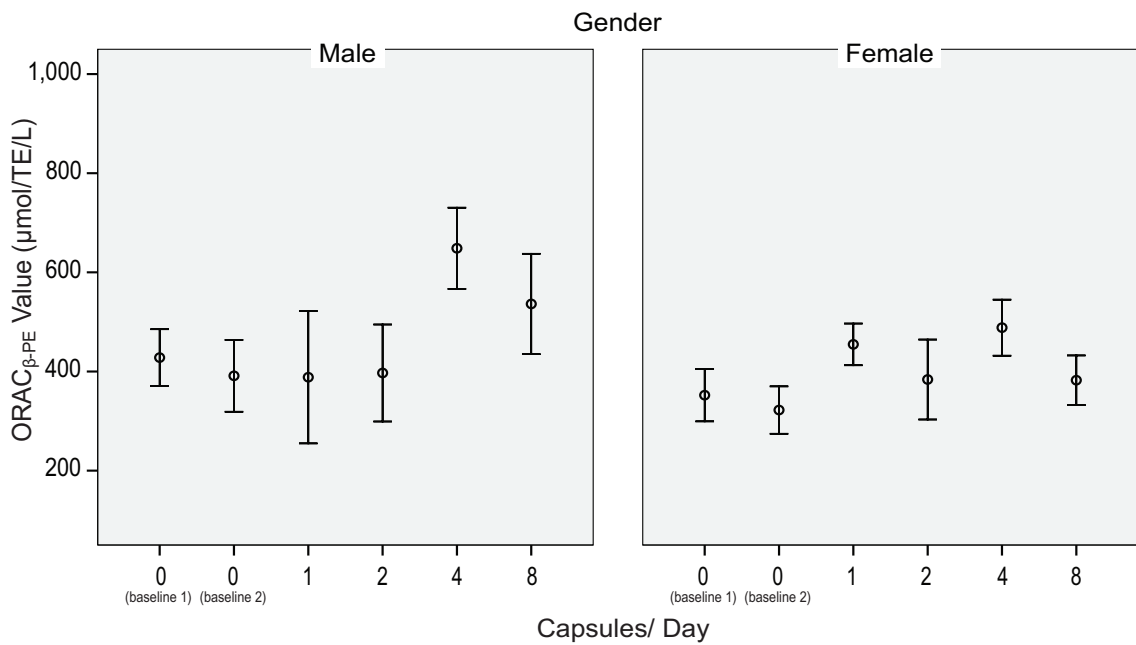

Supplement: MOESM1 [file 9519360]
